# Supplementary material
Source: HighWire-hosted journal article supplement (https://bmjopenquality.bmj.com/highwire/filestream/136248/field_highwire_adjunct_files/0/ds4112.docx)
Supplement: ds4112.docx [file ds4112.docx]

**Pre-intervention and Post-intervention results**
